# Supplementary material
Source: publisher site journal article supplement (https://www.spandidos-publications.com/8137/downloadSupplementary)

Figure S2. Cohort-wise analysis of FRA1 expression in LN and by pathological grade. (A) FRA1 expression in tubulointerstitial samples from GSE113342 (47 LN; 10 controls). (B) FRA1 expression in tubulointerstitial samples from GSE200306 (14 LN; 10 controls). (C) FRA1 expression in GSE113342 stratified by pathological class (Class III-V); Class III contains <3 samples so formal significance testing for that subgroup was not performed. (D) FRA1 expression in GSE200306 stratified by pathological class/activity. In panels A and B, FRA1 was significantly higher in LN vs. controls. In panels C and D, no significant differences were observed among LN pathological subclasses. The conclusions remained unchanged after removal of outliers. Data are plotted as mean  $\pm$  SEM with individual sample points overlaid; group comparisons in panels A-B were performed using two-sided Wilcoxon rank-sum tests; comparisons among pathological subclasses in panels C-D were assessed using the two-sided Kruskal-Wallis test; \*\*P<0.01 and \*\*\*P<0.001.

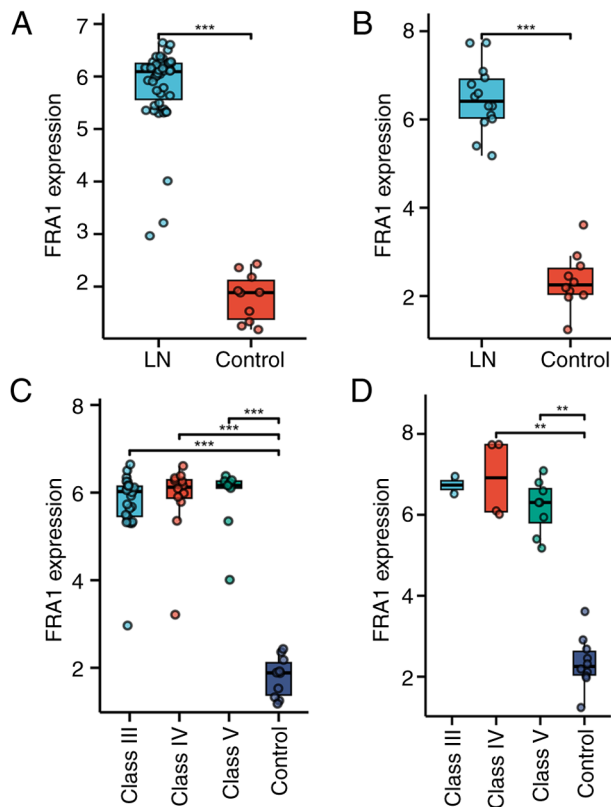

Supplement: Supplementary file 1 [file downloadSupplementary]
